# Supplementary material for: Induction of natural IgE by glucocorticoids
Source: PubMed Central journal article supplement (PMC9475297; doi:10.1084/jem.20220903), 2022-09-13

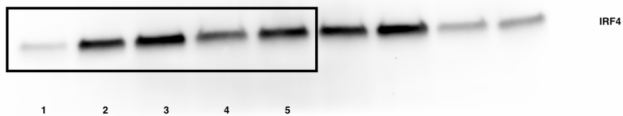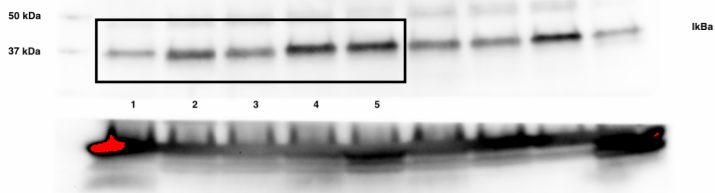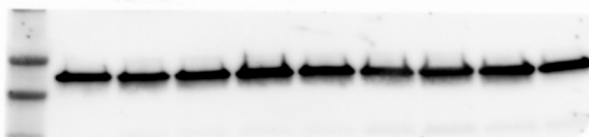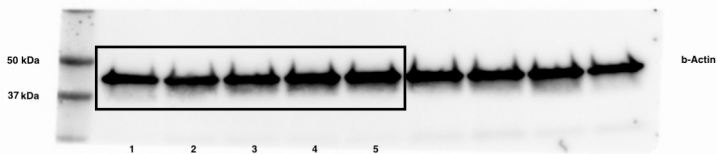

Supplement: JEM_20220903_SourceDataF2.pdf [file JEM_20220903_SourceDataF2.pdf]
